# Supplementary material
Source: PubMed Central journal article supplement (PMC2799709)
Supplement: 0902179106_0902179106SI.pdf [file 0902179106_0902179106SI.pdf]

# Supporting Information

Chen et al. 10.1073/pnas.0902179106

## SI Text

**Strains and Cloning.** UTI89 has been described in ref. 1. Deletion of *fimH* and integration of mutant *fimH* alleles was performed using the Red recombinase system described by Datsenko and Wanner (2), and Murphy and Campellone (3). C3H/HeN mice were obtained from the National Cancer Institute and Harlan. All experiments involving mice were performed using protocols approved by the animal studies committee of Washington University.

**Reagents.** Conjugated BSA (BSA-mannose and BSA-mannotriose) were kindly provided by MedImmune. Guinea pig red blood cells were purchased from Colorado Serum. Enzymes were purchased from New England Biolabs, Invitrogen, and Fisher.

**DNA Sequencing.** The *fimH* and *fimC* genes were separately amplified in PCR reactions using colonies or purified genomic DNA as template. The primers used to amplify *fimH* were *uti8*+4913338 and *uti8*-4915222 (Table S4). The primers used to amplify *fimC* were *uti8*+4908948 and *uti8*-4910744. PCRs contained 1× PCR buffer (Invitrogen) supplemented with 2.5 mM MgCl<sub>2</sub>, 1.4 M betaine, 1.3% DMSO, and 200 μM dNTPs, 5 ng template, 12.5 pmol of each primer, and 1 unit Taq polymerase (Invitrogen). Reactions were held at 95 °C for 5 min, cycled 35 times between 95 °C (1 min), 55 °C (1 min), and 72 °C (3 min), and finished at 72 °C for 10 min. Products were purified (PerfectPrep, Eppendorf) and submitted for capillary sequencing with an ABI 3730xl instrument (SeqWright, Inc.). Sequencing primers included the PCR primers as well as *uti8*+4913927 for *fimH* and *uti8*-4910078 for *fimC*. Base calling and assembly was done using Phred and Phrap (4, 5).

**Sequence Manipulation.** Sequences were aligned using CLUSTALW (6) with default parameters, and trimmed to the start and stop codons of *fimH* and *fimC* as annotated in the UTI89 genome sequence (7). Identical sequences from multiple strains were filtered so that each sequence was represented only once. GENECONV (8) and GARD (9) were used with default parameters to detect recombination. The AICc criterion was used for GARD. Maximum likelihood trees were inferred using PHYML (10), with 100 bootstrap replicates.

**Analysis of Positive Selection.** PAML version 4 (11) was used for all positive selection analyses. The following models were run on the entire set of *fimH* and *fimC* sequences: M1, M2, M7, and M8. Subtrees of *fimH* were identified based on visual inspection and previous studies of FimH phylogenetic trees (12). Previous analysis of *fimH* sequences identified two major groups based on amino acids coded by positions 70 and 78. This was recapitulated in our analysis by the division between subtree 1 from subtrees 2 and 3. Subtree 2 was identified because these *fimH* sequences were closer to each other than to any in subtree 3 and this division had high bootstrap support (99/100 replicates). Subtrees of *fimC* were more difficult to identify, and less clearly defined than the *fimH* subtrees. Subtrees of *fimC* were therefore chosen to give a similar number of subtrees and similar numbers of *fimC* alleles within each subtree as found for *fimH*. To control against possible bias in *fimC* subtree identification, additional positive selection analysis was performed on the following subdivisions of the *fimC* sequences: (i) all sequences from urine isolates versus those from fecal isolates; and (ii) all *fimC* sequences whose corresponding *fimH* sequence fell in subtree 1 (or 2 or 3) of the

*fimH* phylogeny (i.e., imposing the *fimH* phylogeny and subtree divisions upon the *fimC* sequences). All of these tests gave the same result of no detectable positive selection in *fimC*.

The bsA model was run with foreground branches as specified in Fig. 1 and Fig. S1. Additional site models were run using only sequences within each subtree; for these, additional maximum likelihood phylogenetic trees were inferred using PHYML before running the M1, M2, M7, and M8 models again. Likelihood ratio tests (LRTs) were done assuming a X<sup>2</sup> distribution, using twice the difference in log likelihoods as X<sup>2</sup> and the parameter difference as reported by PAML as the degrees of freedom. A Bonferroni correction was applied for each set of comparisons; this was 4 for the whole tree and bsA models, 5 for the *fimH* subtree analyses, and 4 for the *fimC* subtree analyses. Corrected *P* values <0.05 were considered significant.

**Site-Directed Mutagenesis of *fimH*.** The *fimH* gene was amplified by PCR (all PCR for cloning used the same recipe described above under DNA Sequencing) from UTI89 genomic DNA with primers *uti8*+4913338 and *uti8*-4914820 and cloned into pCR4-TOPO (Invitrogen), resulting in plasmid pSLC2-12-*fimH*-TOPO-1. The kanamycin resistance cassette from plasmid pKD4 was amplified with primers *MluI*-*KanL* and *AscI*-*KanR*, cut with *MluI* and *AscI*, and cloned into the *MluI* site of pSLC2-12-*fimH*-TOPO-1. A clone with the kanamycin resistance cassette transcribed in the same direction as *fimH* was isolated based on restriction digest and PCR assays and named pSLC2-16-2. The 2.4-kb fragment containing *fimH* and the kanamycin resistance gene was cut out from pSLC2-16-2 by digestion with *NotI* and *SpeI*, blunted with the Klenow fragment of *E. coli* DNA Polymerase I, and ligated to the 2.4-kb fragment of pUC19 resulting from complete digestion with *PvuII*, giving plasmid pSLC2-24-3.

Site-directed mutagenesis of *fimH* was done by PCR on pSLC2-24-3 using primers *uti8*+4913338, *uti8*-4915222, and new primers (Table S4). Two PCR products resulting from amplification of plasmid pSLC2-24-3 (or a mutated derivative) with (i) a sew-R primer and *uti8*+4913338 and (ii) a sew-L primer and *uti8*-4915222 were purified with the QiaQuick PCR purification kit and eluted in 50 μL of the supplied EB buffer. One microliter of each of these purified products was added as template to a final PCR using primers *uti8*+4913338 and *uti8*-4915222, yielding a 2.9-kb product. This 2.9-kb fragment was digested with *MluI* and *PvuII* and cloned into pSLC2-24-3 that had been fully digested with *MluI* and partially digested with *PvuII* (cut within the *fimH* gene but not the kanamycin-resistance gene) to yield a mutant derivative of pSLC2-24-3.

**Construction of Chromosomal Mutant *fimH* Strains.** The Red recombinase system was used as described in refs. 2 and 3 to replace the chromosomal *fimH* gene in UTI89 with a kanamycin resistance cassette from the pKD4 plasmid (2), using a linear PCR fragment made with primers *uti8*+4913515-*fimH*-pKD4-left and *uti8*-4914747-*fimH*-pKD4-right, resulting in strain SLC2-12-1. The kanamycin resistance cassette was removed by transient expression of the Flp recombinase from plasmid pCP20 (13), resulting in strain SLC2-14-1. The pKM208 plasmid (3) was transformed into SLC2-14-1, yielding strain SLC2-17-*fimH*. Strain SLC2-17-*fimH* was made competent per the protocol described in Murphy and Campellone (3) and transformed with the 2.4-kb fragment that resulted from the digestion of pSLC2-24-1 (or a derivative plasmid containing a mutated *fimH* allele) with *EcoRI* and *BsaI*, and integrants were isolated by plating on

LB-kan. All manipulations were verified to have yielded the correct size product when amplified with PCR primers *uti8*+4913338 and *uti8*-4915222. Chromosomal integration junctions and the entire *fimH* gene sequence were verified by sequencing for all *fimH* mutant strains.

**Construction of Phase-Locked ON Mutants.** This was done as described in ref. 14, using primers *FimBE KO#1* and *FimBE KO #2*, except the template plasmid used was *pKD3 (2)*, resulting in a chloramphenicol-resistant strain.

**Type 1 Phase Assay.** This assay was modified from Roesch and Blomfield (15) and Struve and Krogfelt (16). Primers used were *uti8-phaseL* and *uti8-phaseR*. A 50- $\mu$ L PCR was run using 1 $\times$  PCR buffer (Invitrogen), 2.5 mM  $MgCl_2$ , 200  $\mu$ M dNTPs (each), 10 pmol of each primer, and 1 unit Taq polymerase. One microliter of bacterial culture was used as template. The reaction was heated to 95 °C for 5 min then cycled 35 times between 95 °C (1 min), 55 °C (1 min), and 72 °C (1 min). Ten microliters of this reaction was mixed with 2  $\mu$ L of 10 $\times$  *Hin*I buffer and 1 unit *Hin*I restriction enzyme in a 20- $\mu$ L reaction, incubated at 37 °C for 1 h, and analyzed on a 2% agarose gel.

**Type 1-Inducing Cultures.** A single colony on solid media was inoculated into 10 mL Luria-Bertani (LB) media (Fisher Scientific) in a 125-mL flask and incubated without shaking at 37 °C for 18–24 h. Ten microliters of this culture was inoculated into 10 mL fresh LB media in a second 125-mL flask and incubated without shaking at 37 °C for 18–24 h.

**Immunoblotting.** Bacteria grown under type 1 inducing conditions were pelleted (4,000  $\times$  *g* for 10 min at 4 °C) and resuspended in PBS to a final  $OD_{600}$  of 1.0. One milliliter of this cell suspension was pelleted and resuspended in 100  $\mu$ L of 4 $\times$  SDS loading buffer and stored at -20 °C. Before electrophoresis, samples were thawed, mixed thoroughly with 3  $\mu$ L of 1 M HCl, heated to 95 °C for 5 min, neutralized with 3  $\mu$ L of 1 M NaOH, and centrifuged at 14,000  $\times$  *g* for 2 min. Ten microliters of the resulting supernatant was loaded onto a 12% SDS/PAGE gel, transferred to a nitrocellulose membrane, blotted with a polyclonal rabbit anti-FimA or anti-FimCH sera (1:5,000 dilution), blotted with a monoclonal HRP-conjugated goat anti-rabbit IgG antibody (1:10,000 dilution, Pierce), and detected with the SuperSignal Pico (Pierce) luminescence substrate.

**Electron Microscopy.** Bacteria were grown under type 1 inducing conditions then prepared for microscopy as described in ref. 17. A semiquantitative scale (from 1 to 10) for three parameters was used to compare pili between different mutants: fraction of piliated cells, average number of pili per piliated cell, and average pilus length.

**Hemagglutination Titers.** HA titers were performed as described in ref. 18, with minor modifications. Briefly, 1 mL of an  $OD_{600}$  1.0 suspension of bacterial cells in PBS was gently pelleted (4,000  $\times$  *g*, 2 min) and resuspended in 100  $\mu$ L PBS. Twenty-five microliters of this was serially diluted in a row of a 96-well V-bottom plate where each well contained 25  $\mu$ L PBS (dilution range 1:2 to 1:4,096). Twenty-five microliters of guinea pig red blood cells were added to each well, agitated, and incubated overnight at 4 °C. The HA titer reported was the greatest dilution of cells that resulted in visible clumping of erythrocytes.

**Mannose-Conjugated BSA ELISA.** Cells were prepared as for HA titers. Ninety-six-well ELISA plates were coated at 37 °C for 1 h with 0.8  $\mu$ g BSA-mannotriose, BSA-mannose, or bovine RNaseB in 100  $\mu$ L PBS. Wells were washed three times with 200  $\mu$ L 0.005% Tween-20 in PBS and blocked with 200  $\mu$ L of 4%

milk in PBS for 2 h at 37 °C. One hundred microliters of a 2-fold dilution series (dilution range 1:1 to 1:2,048) of cell suspension was added to each row of the ELISA plate, bound for 1 h at 37 °C while shaking at 100 rpm, then washed three times in 200  $\mu$ L PBS. Detection was done by adding polyclonal rabbit anti-FimH sera (1:500 dilution) for 30 min at 37 °C, washing three times with 200  $\mu$ L PBS, adding a monoclonal AP-conjugated goat anti-rabbit IgG antibody (1:1,000 dilution) for 2 h at 37 °C, and washing again with PBS. Wells were subsequently washed two times with 200  $\mu$ L PBS and twice with ELISA buffer (100 mM Tris, pH 9.5; 50 mM  $MgCl_2$ ; and 100 mM NaCl). One hundred microliters of 2 mg/mL *para*-nitrophenylphosphate (Sigma) in ELISA buffer was added for 30 min and absorbance at 405 nm was measured. The titer reported was the greatest dilution of cells that exceeded a baseline absorbance, calculated as three standard deviations above the mean fluorescence of control wells that contained no bacteria.

**Binding and Invasion to Cultured Bladder Epithelial Cells.** This assay was performed as described in refs. 19 and 20.

**In Vivo Fitness Assay.** Infection of 7- to 8-week-old C3H/HeN mice was performed as described in ref. 21, with minor modifications. Briefly, bacteria were grown under type 1 inducing conditions, harvested, then resuspended to an  $OD_{600}$  of 0.5 in PBS. Fifty microliters of this suspension was instilled transurethrally into the bladder. After 24 h, mice were killed, and bladders were aseptically removed and homogenized in 1 mL PBS. Serial dilutions were plated and total bacterial load per bladder was calculated.

**In Vivo IBC Formation Assay.** This assay was performed as described in ref. 22.

**In Vivo Gentamicin Protection Assay.** This assay was performed according to (21) with minor modifications. Briefly, cells were prepared and mice infected as described above for the in vivo fitness assay. One hour postinfection, mice were killed and bladders were aseptically removed. Bladders were hemisected and washed three times with 500  $\mu$ L PBS. These three washes were combined and plated to obtain titers for loosely adherent and extracellular bacteria (Wash 1). Washed bladders were then incubated with shaking for 90 min at 37 °C in 100  $\mu$ g/mL gentamicin. Bladders were then washed twice with 1 mL PBS to remove gentamicin, homogenized in 1 mL PBS, and titered. Bacterial titers from the bladder homogenate were presumed to represent intracellular bacteria.

**In Vivo Competitive Gastrointestinal Colonization Assay.** Bacteria were grown under type 1 inducing conditions. Two hundred microliters of an equal mixture of UTI89 (kanamycin sensitive) and a mutant strain (kanamycin resistant) carrying either a wild-type *fimH* or the A27V/V163A allele in PBS ( $2 \times 10^8$  total CFUs/200  $\mu$ L) was gavaged into 6- to 8-week-old C57/Bl6 female mice (five mice per strain). Mice for each group were housed in separate gnotobiotic isolators. At 1, 4, 7, 11, and 14 days post-gavage, fecal pellets were collected from each mouse, homogenized, and titered on nonselective media for total CFUs. Fifty individual colonies were then assayed for kanamycin resistance to measure the ratio of mutant (kanamycin resistant) to UTI89 (kanamycin sensitive) titers.

**Coinfection with GFP-Producing FimH Mutant Strains.** FimH mutant strains were transformed with the *pComGFP* plasmid as described in ref. 23. Coinfection of mice, bladder harvest and staining, and confocal microscopy were performed as described in ref. 24.

**Supporting Discussion.** FimH mutations have been previously tested for mannose binding affinity in several studies (12, 25–28). Our mannose binding assays are largely consistent with these previous reports; discrepancies noted here may be due to one of several possibilities: (i) different *E. coli* strains; (ii) different background FimH amino acid sequence (not previously tested systematically); and (iii) differences in phase regulation.

We found that all FimH mutants have strong binding to tri-mannose (Fig. S3), as previously reported. Mutation of Ala-27 to Val-27 has been shown to cause a change from low- to

high-mannose binding (12). Using FimH sequences identical to those previously reported, we do not consistently see the same effect (Fig. S3, mutants 7 and 15). However, by comparing mutants 5, 6, and 8 with mutants 13, 14, and 16, respectively, in Fig. S3, our results extend previous studies and demonstrate that there is, indeed, consistently lower mono-mannose binding affinity for FimH variants containing Ala-27 compared with those possessing Val-27. This result holds when position 27 is mutated in several different FimH sequences.

- Mulvey MA, Schilling JD, Hultgren SJ (2001) Establishment of a persistent *Escherichia coli* reservoir during the acute phase of a bladder infection. *Infect Immun* 69:4572–4579.
- Datsenko KA, Wanner BL (2000) One-step inactivation of chromosomal genes in *Escherichia coli* K-12 using PCR products. *Proc Natl Acad Sci USA* 97:6640–6645.
- Murphy KC, Campellone KG (2003) Lambda Red-mediated recombinogenic engineering of enterohemorrhagic and enteropathogenic *E. coli*. *BMC Mol Biol* 4:11.
- Ewing B, Green P (1998) Base-calling of automated sequencer traces using phred. II. Error probabilities. *Genome Res* 8:186–194.
- Ewing B, Hillier L, Wendl MC, Green P (1998) Base-calling of automated sequencer traces using phred. I. Accuracy assessment. *Genome Res* 8:175–185.
- Thompson JD, Higgins DG, Gibson TJ (1994) CLUSTAL W: Improving the sensitivity of progressive multiple sequence alignment through sequence weighting, position-specific gap penalties and weight matrix choice. *Nucleic Acids Res* 22:4673–4680.
- Chen SL, et al. (2006) Identification of genes subject to positive selection in uropathogenic strains of *Escherichia coli*: A comparative genomics approach. *Proc Natl Acad Sci USA* 103:5977–5982.
- Sawyer S (1989) Statistical tests for detecting gene conversion. *Mol Biol Evol* 6:526–538.
- Kosakovsky Pond SL, Posada D, Gravenor MB, Woelk CH, Frost SD (2006) GARD: A genetic algorithm for recombination detection. *Bioinformatics* 22:3096–3098.
- Guindon S, Gascuel O (2003) A simple, fast, and accurate algorithm to estimate large phylogenies by maximum likelihood. *Syst Biol* 52:696–704.
- Yang Z (2007) PAML 4: Phylogenetic analysis by maximum likelihood. *Mol Biol Evol* 24:1586–1591.
- Sokurenko EV, Courtney HS, Maslow J, Siitonen A, Hasty DL (1995) Quantitative differences in adhesiveness of type 1 fimbriated *Escherichia coli* due to structural differences in fimH genes. *J Bacteriol* 177:3680–3686.
- Cherepanov PP, Wackernagel W (1995) Gene disruption in *Escherichia coli*: TcR and KmR cassettes with the option of Flp-catalyzed excision of the antibiotic-resistance determinant. *Gene* 158:9–14.
- Hannan TJ, et al. (2008) LeuX tRNA-dependent and -independent mechanisms of *Escherichia coli* pathogenesis in acute cystitis. *Mol Microbiol* 67:116–128.
- Roesch PL, Blomfield IC (1998) Leucine alters the interaction of the leucine-responsive regulatory protein (Lrp) with the fim switch to stimulate site-specific recombination in *Escherichia coli*. *Mol Microbiol* 27:751–761.
- Struve C, Krogfelt KA (1999) In vivo detection of *Escherichia coli* type 1 fimbrial expression and phase variation during experimental urinary tract infection. *Microbiology* 145:2683–2690.
- Wright KJ, Seed PC, Hultgren SJ (2005) Uropathogenic *Escherichia coli* flagella aid in efficient urinary tract colonization. *Infect Immun* 73:7657–7668.
- Hultgren SJ, Schwan WR, Schaeffer AJ, Duncan JL (1986) Regulation of production of type 1 pili among urinary tract isolates of *Escherichia coli*. *Infect Immun* 54:613–620.
- Elsinghorst EA (1994) Measurement of invasion by gentamicin resistance. *Methods Enzymol* 236:405–420.
- Martinez JJ, Mulvey MA, Schilling JD, Pinkner JS, Hultgren SJ (2000) Type 1 pilus-mediated bacterial invasion of bladder epithelial cells. *EMBO J* 19:2803–2812.
- Mulvey MA, et al. (1998) Induction and evasion of host defenses by type 1-piliated uropathogenic *Escherichia coli*. *Science* 282:1494–1497.
- Justice SS, Lauer SR, Hultgren SJ, Hunstad DA (2006) Maturation of intracellular *Escherichia coli* communities requires SurA. *Infect Immun* 74:4793–4800.
- Justice SS, et al. (2004) Differentiation and developmental pathways of uropathogenic *Escherichia coli* in urinary tract pathogenesis. *Proc Natl Acad Sci USA* 101:1333–1338.
- Garofalo CK, et al. (2007) *Escherichia coli* from urine of female patients with urinary tract infections is competent for intracellular bacterial community formation. *Infect Immun* 75:52–60.
- Aprikian P, et al. (2007) Interdomain interaction in the FimH adhesin of *Escherichia coli* regulates the affinity to mannose. *J Biol Chem* 282:23437–23446.
- Sokurenko EV, Courtney HS, Ohman DE, Klemm P, Hasty DL (1994) FimH family of type 1 fimbrial adhesins: Functional heterogeneity due to minor sequence variations among fimH genes. *J Bacteriol* 176:748–755.
- Sokurenko EV, Courtney HS, Abraham SN, Klemm P, Hasty DL (1992) Functional heterogeneity of type 1 fimbriae of *Escherichia coli*. *Infect Immun* 60:4709–4719.
- Sokurenko EV, Chesnokova V, Doyle RJ, Hasty DL (1997) Diversity of the *Escherichia coli* type 1 fimbrial lectin. Differential binding to mannosides and uroepithelial cells. *J Biol Chem* 272:17880–17886.



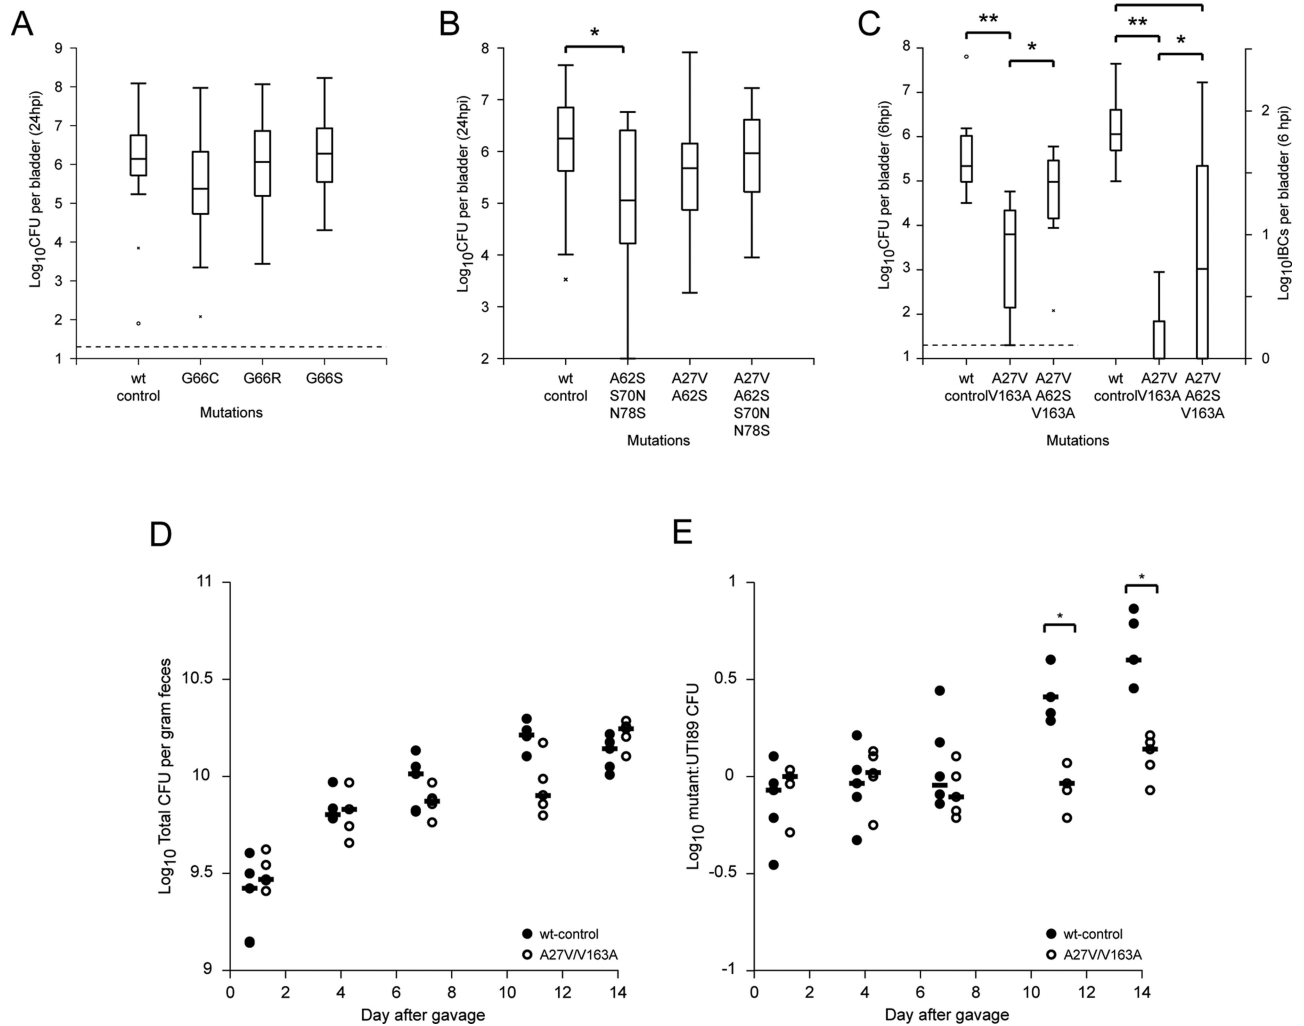

**Fig. S2.** In vivo fitness assays. (A and B) CFUs/bladder at 24 hpi. Mutations present are shown on the x axis. The y axis indicates the logarithm (base 10) of the bacterial CFUs measured in mouse bladders 24 hpi. Data are represented as box-and-whisker plots summarizing data from 15 to 20 mice for each strain. \*,  $P < 0.05$ , \*\*,  $P < 0.001$ , two-tailed Mann–Whitney test. (C) In vivo CFUs and IBC formation at 6 hpi. Mutations present are shown on the x axis. Left three lanes and y axis plot CFUs/bladder at 6 hpi. Dotted line represents the limit of detection. Right three lanes and y axis show IBCs formed per bladder. Data are represented as box-and-whisker plots summarizing data from 10 mice for each strain. \*,  $P < 0.05$ , \*\*,  $P < 0.001$ , two-tailed Mann–Whitney test. (D and E) Competition assays for gut colonization in gntobiotic mice. (D) Total bacterial load in feces. y axis plots the log (base 10) of the total colony forming units per gram of feces. Each dot represents one fecal pellet from one mouse. Filled circles represent data for mice colonized with UTI89 and the wt-control strain. Open circles represent data for mice colonized with UTI89 and the A27V/V163A mutant. Black bars indicate medians. (E) Relative abundance of mutant and UTI89 colonies recovered from feces. The number of days after gavage is shown on the x axis. y axis plots the log (base 10) of the ratio of mutant (antibiotic resistant) colonies to wild-type parental UTI89 (antibiotic sensitive) colonies in fecal pellets. Each dot represents one fecal pellet from one mouse. \*,  $P < 0.05$ , two-tailed Mann–Whitney test.

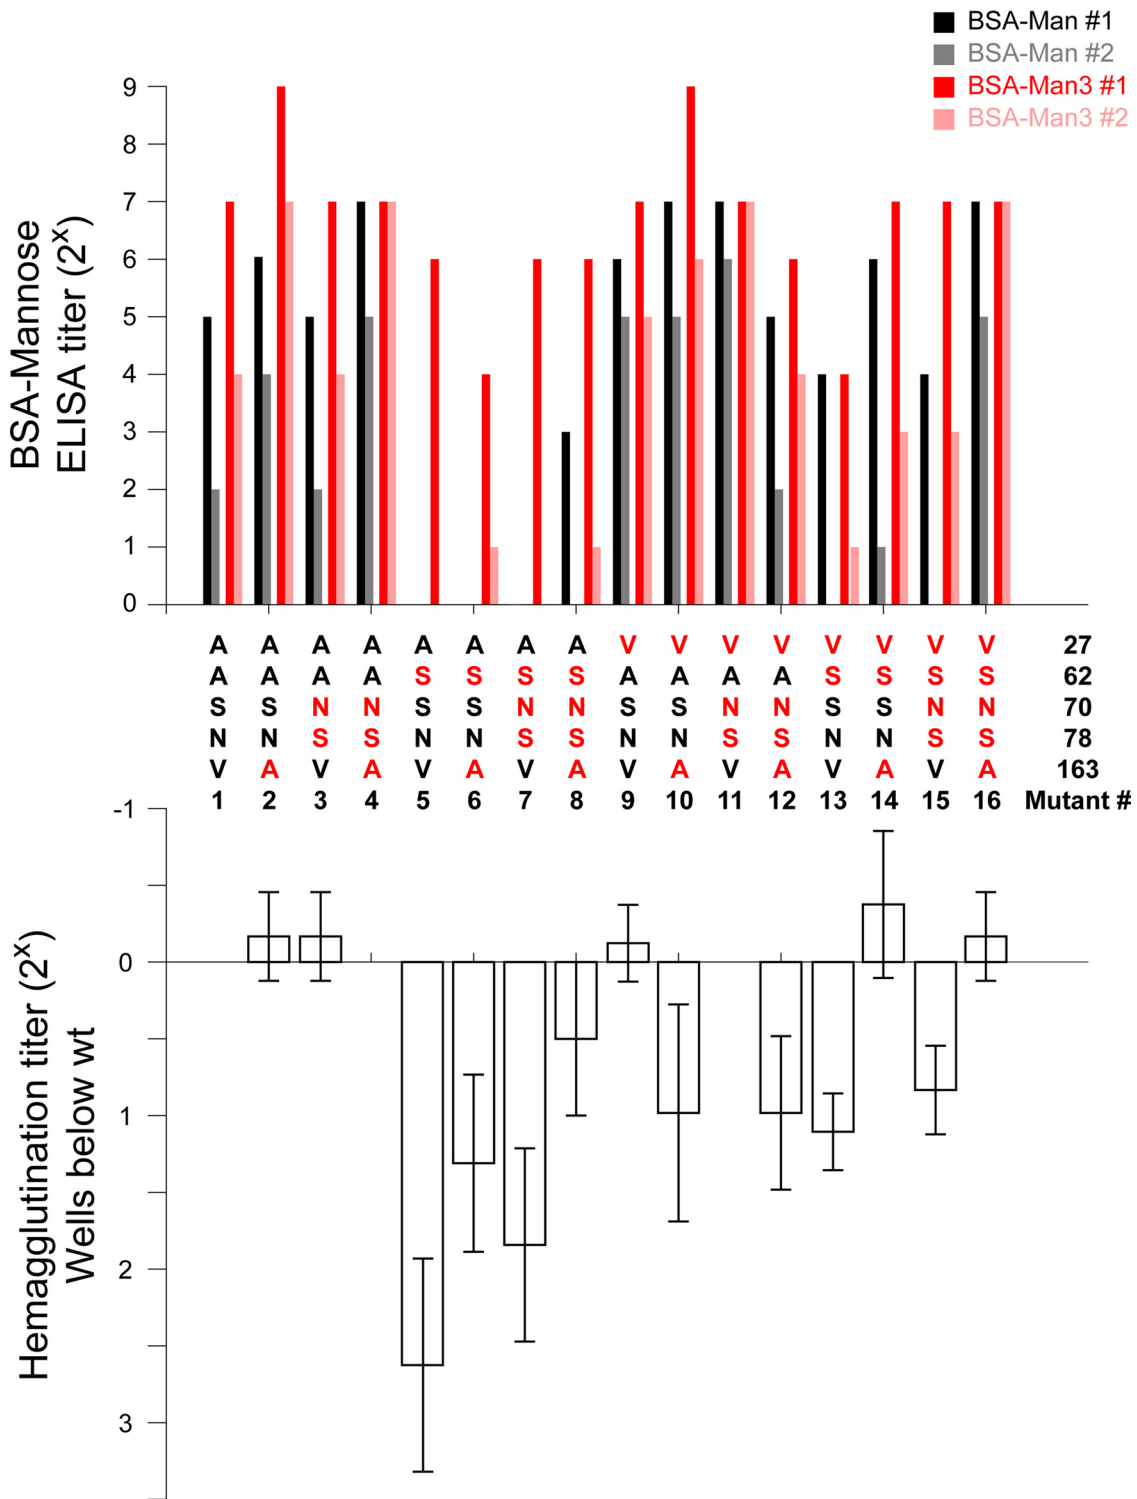

**Fig. S3.** In vitro mannose binding ELISA and hemagglutination assays. FimH sequence at positions 27, 62, 70, 78, and 163 are indicated on the x axis. Black indicates that the sequence is identical to the UT189 FimH allele at that position, and red indicates a mutation. An arbitrary mutant number is also assigned for ease of reference. Upper panel indicates the log (base 2) of the titer for binding to BSA conjugated with mannose. Black/gray bars indicate binding titer in each of two independent experiments to BSA conjugated to monomannose. Red/pink bars, titer in two experiments for BSA conjugated to mannotriose. Lower panel indicates the log (base 2) of the decrease in hemagglutination (HA) titer relative to UT189. Mean decrease is represented by bars, error bars indicate standard deviation. Each bar, at least  $n = 3$  experiments.

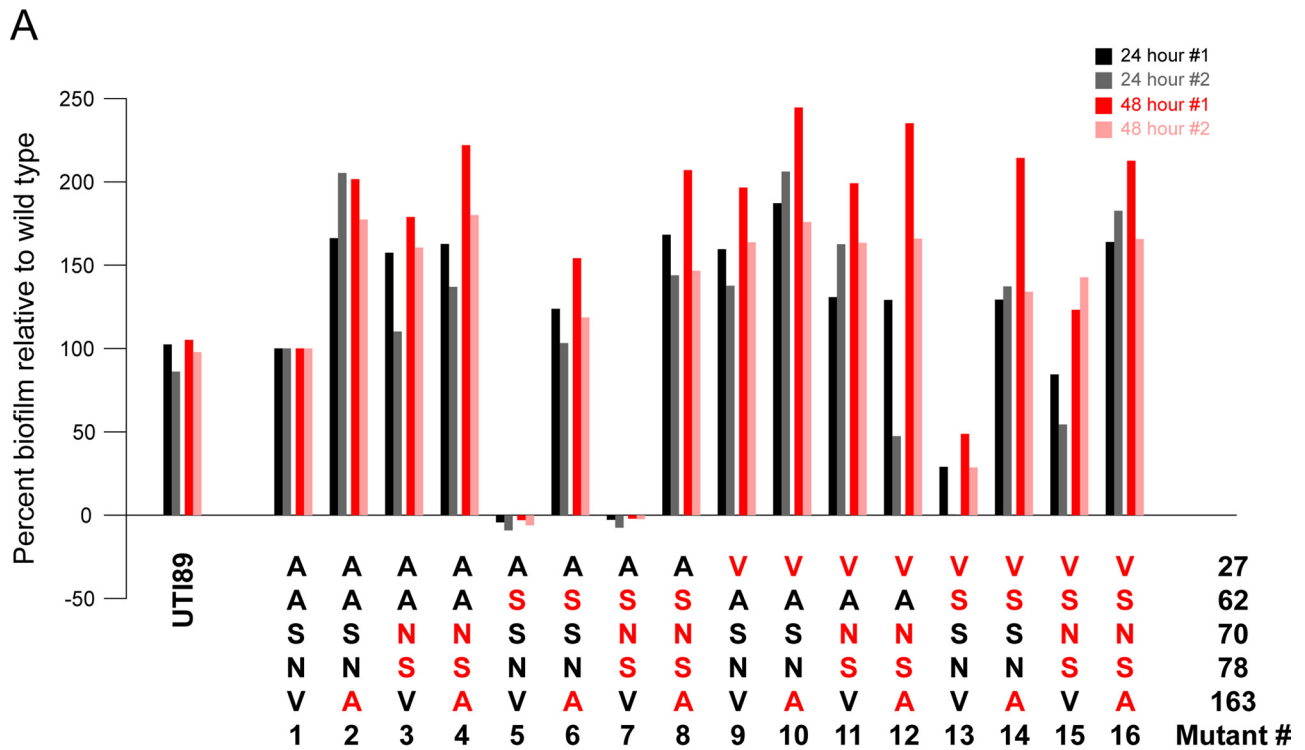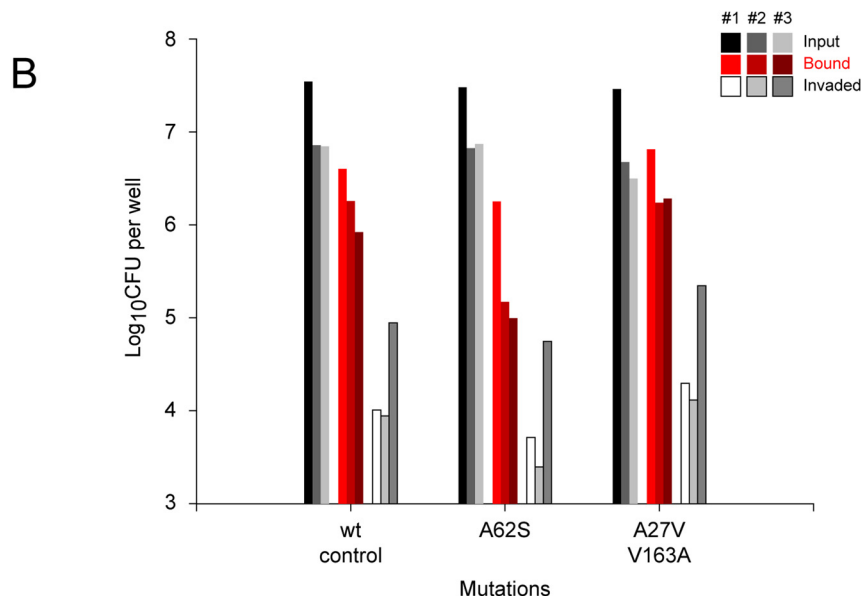

**Fig. S4.** In vitro biofilm formation and binding and invasion assays. (A) FimH sequence at positions 27, 62, 70, 78, and 163 and mutant number are indicated on the x axis as in Fig. S3. UTI89 indicates the parental UTI89 strain. The y axis plots the percentage of biofilm formation relative to a strain carrying the wild-type UTI89 *fimH* allele (mutant number 1) as measured by crystal violet staining. Black/gray bars represent mean biofilm formation of triplicate measurements after 24 h in two separate assays. Red/pink bars represent biofilm formation of triplicate measurements after 48 h in two separate assays. (B) In vitro binding and invasion assay. Tested strains are indicated on the x axis. The y axis plots the logarithm of bacterial CFUs per well. Black/gray bars represent bacterial CFUs added to cultured 5637 (human) bladder epithelial cells. Red/pink bars, CFUs remaining bound to 5637 cells after washing. White/gray bars outlined in black represent CFUs remaining after gentamicin treatment, indicating invasion. Bars, the average of three wells. Data from three independent experiments are shown.

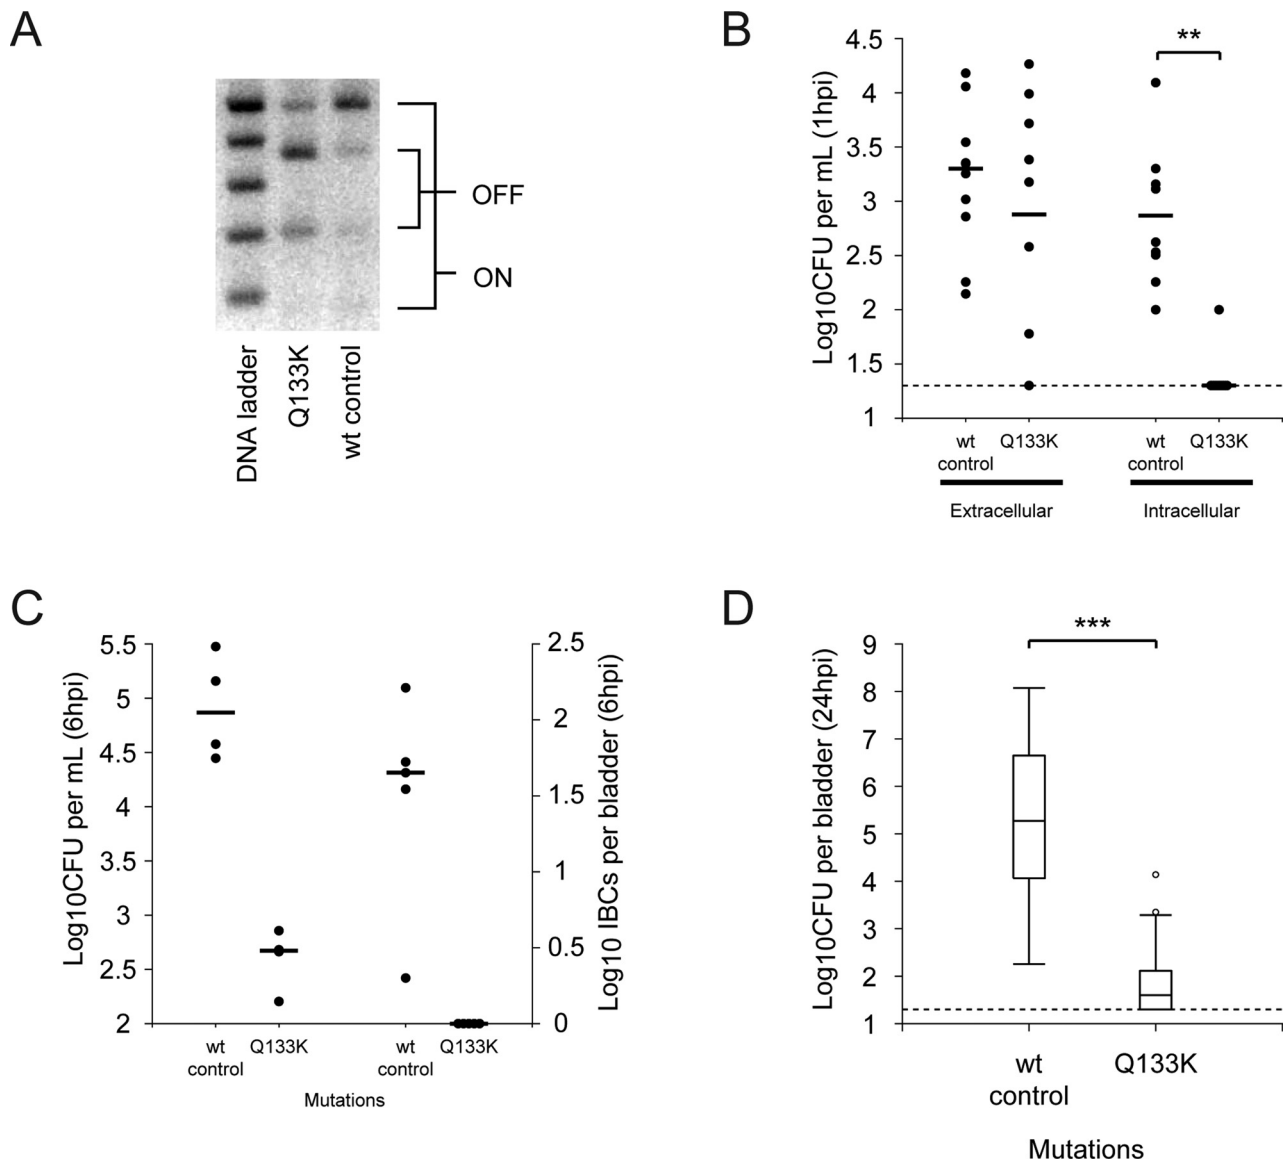

**Fig. S5.** Phase assay and in vivo fitness of Q133K (FimH mannose-binding pocket mutant) strain. (A) Phase assay under type 1 inducing conditions. Left lane contains DNA markers from 100 to 500 bp at 100-bp intervals. Phase ON and phase OFF bands are indicated on the right. FimH mutant strain is indicated at the bottom. (B) In vivo gentamicin protection assay. Mutations present in tested strains are shown on the x axis. The y axis plots the logarithm (base 10) of the number of bacterial CFUs per mL of wash or homogenate. The two left lanes show CFUs per mL of wash solution, representing luminal and loosely bound extracellular bacteria in the bladder. Right two lanes are CFUs per bladder after treatment with gentamicin and homogenization in 1 mL PBS, representing intracellular bacteria. (C) In vivo CFUs and IBC formation at 6 hpi. Mutants indicated on the x axis. Left two lanes and y axis are logarithm of CFUs/bladder at 6 hpi. Right two lanes and y axis display IBCs formed per bladder. Bladders with no IBCs detected are graphed as having one IBC. (D) Twenty-four hours postinfection in vivo fitness test. The FimH mutant strain is indicated on the x axis. y axis indicates the logarithm (base 10) of the bacterial CFUs measured in mouse bladders at 24 hpi. The dotted line represents the limit of detection. Data are represented as box-and-whisker plots summarizing results from 30 to 40 mice per strain. \*\*,  $P < 0.001$ , \*\*\*,  $P < 0.0001$ , two-tailed Mann-Whitney test.



**Table S1. List of strains sequenced**

Genome sequences

| <i>fimH</i> allele | <i>fimC</i> allele | Name                       | GenBank Accession | <i>fimH</i> subtree | <i>fimC</i> subtree |
|--------------------|--------------------|----------------------------|-------------------|---------------------|---------------------|
| 7                  | 29                 | K12                        | NC_000913         | 3                   | 3                   |
| 7                  | 29                 | W3110                      | AC_000091         | 3                   | 3                   |
| 14                 | 5                  | EDL933                     | NC_002655         | 3                   | 3                   |
| 27                 | 17                 | CFT073                     | NC_004431         | 1                   | 1                   |
| 30                 | 52                 | Shigella flexneri 2a 2457T | NC_004741         | 3                   | 3                   |
| 30                 | 52                 | Shigella flexneri 2a 301   | NC_004337         | 3                   | 3                   |
| 68                 | 8                  | APEC O1                    | NC_008563         | 1                   | 1                   |
| 69                 | 8                  | UTI89                      | NC_007946         | 1                   | 1                   |

Laboratory strains

| <i>fimH</i> allele | <i>fimC</i> allele | Original Name | Isolation Location | <i>fimH</i> subtree | <i>fimC</i> subtree |
|--------------------|--------------------|---------------|--------------------|---------------------|---------------------|
| 7                  | 29                 | MG1655        | Feces              | 3                   | 3                   |
| 69                 | 8                  | UTI89         | Urine              | 1                   | 1                   |
| 33                 | 17                 | ASB1298       | Urine              | 1                   | 1                   |
| 27                 | 17                 | CFT073        | Urine              | 1                   | 1                   |
| 14                 | 5                  | EDL933        |                    | 3                   | 3                   |
| 69                 | 8                  | NU14          | Urine              | 1                   | 1                   |
| 7                  | 6                  | J96           | Urine              | 3                   | 3                   |
| 27                 | 17                 | DS17          |                    | 1                   | 1                   |
| 69                 | 8                  | EC45          |                    | 1                   | 1                   |
| 65                 | 54                 | E80           |                    | 3                   | 1                   |
| 7                  | 37                 | GR12          |                    | 3                   | 3                   |
| 73                 | 55                 | 536           | Urine              | 1                   | 1                   |

Clinical strains

| <i>fimH</i> allele | <i>fimC</i> allele | Original Name | Isolation Location | Isolation Species | Study/Collection | Patient Number | <i>fimH</i> subtree | <i>fimC</i> subtree |
|--------------------|--------------------|---------------|--------------------|-------------------|------------------|----------------|---------------------|---------------------|
| 3                  | 33                 | PY2           | Urine              | Human Female      |                  |                | 2                   | 2                   |
| 60                 | 26                 | PY3           | Urine              | Human Female      |                  |                | 3                   | 2                   |
| 3                  | 33                 | TOP115        | Urine              | Human Female      | TOP              | 2              | 2                   | 2                   |
| 56                 | 41                 | TOP320        | Urine              | Human Female      | TOP              | 2              | 3                   | 2                   |
| 50                 | 8                  | TOP409        | Urine              | Human Female      | TOP              | 5              | 1                   | 1                   |
| 7                  | 6                  | TOP207        | Urine              | Human Female      | TOP              | 5              | 3                   | 3                   |
| 67                 | 15                 | TOP599        | Urine              | Human Female      | TOP              | 9              | 3                   | 3                   |
| 62                 | 21                 | TOP227        | Urine              | Human Female      | TOP              | 9              | 3                   | 2                   |
| 62                 | 21                 | TOP578        | Urine              | Human Female      | TOP              | 11             | 3                   | 2                   |
| 65                 | 9                  | TOP263        | Urine              | Human Female      | TOP              | 11             | 3                   | 2                   |
| 65                 | 9                  | TOP799        | Urine              | Human Female      | TOP              | 12             | 3                   | 2                   |
| 65                 | 9                  | TOP876        | Urine              | Human Female      | TOP              | 12             | 3                   | 2                   |
| 7                  | 6                  | TOP379        | Urine              | Human Female      | TOP              | 12             | 3                   | 3                   |
| 7                  | 6                  | TOP291        | Urine              | Human Female      | TOP              | 13             | 3                   | 3                   |
| 7                  | 6                  | TOP498        | Urine              | Human Female      | TOP              | 13             | 3                   | 3                   |
| 27                 | 17                 | TOP344        | Urine              | Human Female      | TOP              | 17             | 1                   | 1                   |
| 27                 | 17                 | TOP746        | Urine              | Human Female      | TOP              | 17             | 1                   | 1                   |
| 73                 | 55                 | TOP345        | Urine              | Human Female      | TOP              | 20             | 1                   | 1                   |
| 73                 | 55                 | TOP493        | Urine              | Human Female      | TOP              | 20             | 1                   | 1                   |
| 73                 | 55                 | TOP587        | Urine              | Human Female      | TOP              | 20             | 1                   | 1                   |
| 73                 | 55                 | TOP356        | Urine              | Human Female      | TOP              | 21             | 1                   | 1                   |
| 73                 | 55                 | TOP673        | Urine              | Human Female      | TOP              | 21             | 1                   | 1                   |
| 45                 | 13                 | TOP596        | Urine              | Human Female      | TOP              | 26             | 1                   | 1                   |
| 45                 | 13                 | TOP1090       | Urine              | Human Female      | TOP              | 26             | 1                   | 1                   |
| 9                  | 15                 | TOP1002       | Urine              | Human Female      | TOP              | 31             | 3                   | 3                   |
| 65                 | 9                  | TOP1074       | Urine              | Human Female      | TOP              | 31             | 3                   | 2                   |
| 27                 | 17                 | UTI 3         | Urine              | Human Female      |                  |                | 1                   | 1                   |
| 65                 | 9                  | UTI 8         | Urine              | Human Female      |                  |                | 3                   | 2                   |
| 34                 | 16                 | UTI 10        | Urine              | Human Female      |                  |                | 2                   | 2                   |
| 65                 | 9                  | UTI 28        | Urine              | Human Female      |                  |                | 3                   | 2                   |
| 63                 | 15                 | UTI 4         | Urine              | Human Female      |                  |                | 3                   | 3                   |
| 69                 | 8                  | ASB 408       | Urine              | Human Female      |                  |                | 1                   | 1                   |

## Clinical strains

| <i>fimH</i> allele | <i>fimC</i> allele | Original Name | Isolation Location | Isolation Species | Study/Collection | Patient Number | <i>fimH</i> subtree | <i>fimC</i> subtree |
|--------------------|--------------------|---------------|--------------------|-------------------|------------------|----------------|---------------------|---------------------|
| 42                 | 57                 | ASB 452       | Urine              | Human Female      |                  |                | 1                   | 1                   |
| 60                 | 26                 | ASB 640       | Urine              | Human Female      |                  |                | 3                   | 2                   |
| 73                 | 55                 | ASB 1061      | Urine              | Human Female      |                  |                | 1                   | 1                   |
| 32                 | 17                 | ASB 1273      | Urine              | Human Female      |                  |                | 1                   | 1                   |
| 16                 | 41                 | ASB 1286      | Urine              | Human Female      |                  |                | 3                   | 2                   |
| 33                 | 17                 | ASB 1297      | Urine              | Human Female      |                  |                | 1                   | 1                   |
| 69                 | 8                  | ASB 131       | Urine              | Human Female      |                  |                | 1                   | 1                   |
| 46                 | 17                 | ASB 167       | Urine              | Human Female      |                  |                | 1                   | 1                   |
| 65                 | 9                  | ASB 229       | Urine              | Human Female      |                  |                | 3                   | 2                   |
| 65                 | 9                  | ASB 389       | Urine              | Human Female      |                  |                | 3                   | 2                   |
| 60                 | 26                 | ASB 556       | Urine              | Human Female      |                  |                | 3                   | 2                   |
| 69                 | 8                  | ASB 586       | Urine              | Human Female      |                  |                | 1                   | 1                   |
| 73                 | 55                 | ASB 957       | Urine              | Human Female      |                  |                | 1                   | 1                   |
| 60                 | 26                 | ASB 1134      | Urine              | Human Female      |                  |                | 3                   | 2                   |
| 60                 | 26                 | ASB 1158      | Urine              | Human Female      |                  |                | 3                   | 2                   |
| 67                 | 43                 | ASB 271       | Urine              | Human Female      |                  |                | 3                   | 3                   |
| 7                  | 6                  | ASB 277       | Urine              | Human Female      |                  |                | 3                   | 3                   |
| 78                 | 7                  | ASB 278       | Urine              | Human Female      |                  |                | 3                   | 2                   |
| 79                 | 55                 | ASB 506       | Urine              | Human Female      |                  |                | 1                   | 1                   |
| 69                 | 8                  | ASB 781       | Urine              | Human Female      |                  |                | 1                   | 1                   |
| 57                 | 31                 | ASB 1111      | Urine              | Human Female      |                  |                | 1                   | 1                   |
| 73                 | 55                 | ASB 1135      | Urine              | Human Female      |                  |                | 1                   | 1                   |
| 32                 | 17                 | ASB 1282      | Urine              | Human Female      |                  |                | 1                   | 1                   |
| 60                 | 26                 | ASB 933       | Urine              | Human Female      |                  |                | 3                   | 2                   |
| 25                 | 28                 | ASB 934       | Urine              | Human Female      |                  |                | 3                   | 3                   |
| 18                 | 6                  | ASB 941       | Urine              | Human Female      |                  |                | 3                   | 3                   |
| 60                 | 26                 | ASB 942       | Urine              | Human Female      |                  |                | 3                   | 2                   |
| 18                 | 6                  | ASB 950       | Urine              | Human Female      |                  |                | 3                   | 3                   |
| 18                 | 6                  | ASB 951       | Urine              | Human Female      |                  |                | 3                   | 3                   |
| 32                 | 17                 | ASB 1231      | Urine              | Human Female      |                  |                | 1                   | 1                   |
| 61                 | 51                 | ASB 451       | Urine              | Human Female      |                  |                | 3                   | 3                   |
| 59                 | 30                 | ASB 795       | Urine              | Human Female      |                  |                | 3                   | 3                   |
| 76                 | 55                 | ASB 967       | Urine              | Human Female      |                  |                | 1                   | 1                   |
| 7                  | 6                  | ASB 1230      | Urine              | Human Female      |                  |                | 3                   | 3                   |
| 7                  | 6                  | rASB 1154-1   | Urine              | Human Female      |                  |                | 3                   | 3                   |
| 7                  | 6                  | rASB 1154-2   | Urine              | Human Female      |                  |                | 3                   | 3                   |
| 7                  | 6                  | rASB 1154-3   | Urine              | Human Female      |                  |                | 3                   | 3                   |
| 57                 | 31                 | rASB 1021-2   | Urine              | Human Female      |                  |                | 1                   | 1                   |
| 57                 | 31                 | rASB 1021-2   | Urine              | Human Female      |                  |                | 1                   | 1                   |
| 57                 | 31                 | rASB 1021-3   | Urine              | Human Female      |                  |                | 1                   | 1                   |
| 60                 | 26                 | rASB 2289-1   | Urine              | Human Female      |                  |                | 3                   | 2                   |
| 60                 | 26                 | rASB 2289-2   | Urine              | Human Female      |                  |                | 3                   | 2                   |
| 60                 | 26                 | rASB 2289-3   | Urine              | Human Female      |                  |                | 3                   | 2                   |
| 33                 | 17                 | ASB 1298      | Urine              | Human Female      |                  |                | 1                   | 1                   |
| 15                 | 34                 | TB226A        | Urine              | Human Female      |                  |                | 3                   | 3                   |
| 47                 | 48                 | TB334C        | Urine              | Human Female      |                  |                | 3                   | 3                   |
| 28                 | 23                 | TBUTI01       | Urine              | Human Female      |                  |                | 3                   | 3                   |
| 15                 | 34                 | TB352C        | Urine              | Human Female      |                  |                | 3                   | 3                   |
| 71                 | 5                  | TB2755        | Urine              | Human Female      |                  |                | 3                   | 3                   |
| 12                 | 1                  | TB154A        | Urine              | Human Female      |                  |                | 2                   | 2                   |
| 15                 | 34                 | TB285A        | Urine              | Human Female      |                  |                | 3                   | 3                   |
| 34                 | 21                 | ECOR1         | Feces              | Human Female      | ECOR             |                | 2                   | 2                   |
| 34                 | 21                 | ECOR2         | Feces              | Human Male        | ECOR             |                | 2                   | 2                   |
| 65                 | 18                 | ECOR3         | Feces              | Dog               | ECOR             |                | 3                   | 1                   |
| 43                 | 21                 | ECOR5         | Feces              | Human Female      | ECOR             |                | 3                   | 2                   |
| 9                  | 44                 | ECOR7         | Feces              | Orangutan         | ECOR             |                | 3                   | 3                   |
| 34                 | 21                 | ECOR8         | Feces              | Human Female      | ECOR             |                | 2                   | 2                   |
| 3                  | 33                 | ECOR9         | Feces              | Human Female      | ECOR             |                | 2                   | 2                   |
| 74                 | 34                 | ECOR10        | Feces              | Human Female      | ECOR             |                | 3                   | 3                   |
| 18                 | 6                  | ECOR11        | Urine              | Human Female      | ECOR             |                | 3                   | 3                   |
| 7                  | 6                  | ECOR12        | Feces              | Human Female      | ECOR             |                | 3                   | 3                   |
| 7                  | 6                  | ECOR14        | Urine              | Human Female      | ECOR             |                | 3                   | 3                   |

## Clinical strains

| <i>fimH</i> allele | <i>fimC</i> allele | Original Name | Isolation Location | Isolation Species | Study/ Collection | Patient Number | <i>fimH</i> subtree | <i>fimC</i> subtree |
|--------------------|--------------------|---------------|--------------------|-------------------|-------------------|----------------|---------------------|---------------------|
| 35                 | 19                 | ECOR16        | Feces              | Leopard           | ECOR              |                | 3                   | 2                   |
| 54                 | 40                 | ECOR17        | Feces              | Pig               | ECOR              |                | 3                   | 3                   |
| 4                  | 35                 | ECOR18        | Feces              | Celebese ape      | ECOR              |                | 3                   | 1                   |
| 34                 | 21                 | ECOR19        | Feces              | Celebese ape      | ECOR              |                | 2                   | 2                   |
| 54                 | 3                  | ECOR20        | Feces              | Steer             | ECOR              |                | 3                   | 3                   |
| 54                 | 3                  | ECOR21        | Feces              | Steer             | ECOR              |                | 3                   | 3                   |
| 35                 | 50                 | ECOR23        | Feces              | Elephant          | ECOR              |                | 3                   | 2                   |
| 7                  | 6                  | ECOR24        | Feces              | Human Female      | ECOR              |                | 3                   | 3                   |
| 74                 | 34                 | ECOR25        | Feces              | Dog               | ECOR              |                | 3                   | 3                   |
| 6                  | 44                 | ECOR26        | Feces              | Human             | ECOR              |                | 3                   | 3                   |
| 6                  | 45                 | ECOR27        | Feces              | Giraffe           | ECOR              |                | 3                   | 3                   |
| 6                  | 44                 | ECOR28        | Feces              | Human Female      | ECOR              |                | 3                   | 3                   |
| 6                  | 14                 | ECOR29        | Feces              | Kangaroo rat      | ECOR              |                | 3                   | 3                   |
| 34                 | 21                 | ECOR30        | Feces              | Bison             | ECOR              |                | 2                   | 2                   |
| 31                 | 20                 | ECOR31        | Feces              | Leopard           | ECOR              |                | 3                   | 2                   |
| 34                 | 21                 | ECOR32        | Feces              | Giraffe           | ECOR              |                | 2                   | 2                   |
| 34                 | 21                 | ECOR33        | Feces              | Sheep             | ECOR              |                | 2                   | 2                   |
| 6                  | 10                 | ECOR34        | Feces              | Dog               | ECOR              |                | 3                   | 3                   |
| 65                 | 54                 | ECOR35        | Feces              | Human Male        | ECOR              |                | 3                   | 1                   |
| 65                 | 54                 | ECOR36        | Feces              | Human Female      | ECOR              |                | 3                   | 1                   |
| 35                 | 26                 | ECOR37        | Feces              | Marmoset          | ECOR              |                | 3                   | 2                   |
| 29                 | 2                  | ECOR39        | Feces              | Human Female      | ECOR              |                | 3                   | 3                   |
| 29                 | 2                  | ECOR40        | Urine              | Human Female      | ECOR              |                | 3                   | 3                   |
| 17                 | 47                 | ECOR42        | Feces              | Human Male        | ECOR              |                | 3                   | 3                   |
| 41                 | 1                  | ECOR43        | Feces              | Human Female      | ECOR              |                | 2                   | 2                   |
| 1                  | 36                 | ECOR44        | Feces              | Cougar            | ECOR              |                | 3                   | 2                   |
| 67                 | 15                 | ECOR45        | Feces              | Pig               | ECOR              |                | 3                   | 3                   |
| 77                 | 12                 | ECOR46        | Feces              | Celebese ape      | ECOR              |                | 3                   | 3                   |
| 56                 | 39                 | ECOR47        | Feces              | Sheep             | ECOR              |                | 3                   | 2                   |
| 24                 | 53                 | ECOR48        | Urine              | Human Female      | ECOR              |                | 3                   | 2                   |
| 53                 | 4                  | ECOR49        | Feces              | Human Female      | ECOR              |                | 2                   | 3                   |
| 12                 | 1                  | ECOR50        | Urine              | Human Female      | ECOR              |                | 2                   | 2                   |
| 55                 | 17                 | ECOR52        | Feces              | Orangutan         | ECOR              |                | 1                   | 1                   |
| 7                  | 6                  | ECOR53        | Feces              | Human Female      | ECOR              |                | 3                   | 3                   |
| 39                 | 17                 | ECOR54        | Feces              | Human             | ECOR              |                | 1                   | 1                   |
| 39                 | 17                 | ECOR55        | Feces              | Human Female      | ECOR              |                | 1                   | 1                   |
| 60                 | 26                 | ECOR56        | Urine              | Human Female      | ECOR              |                | 3                   | 2                   |
| 27                 | 17                 | ECOR57        | Feces              | Gorilla           | ECOR              |                | 1                   | 1                   |
| 2                  | 11                 | ECOR58        | Feces              | Lion              | ECOR              |                | 3                   | 3                   |
| 66                 | 55                 | ECOR59        | Feces              | Human Male        | ECOR              |                | 1                   | 1                   |
| 5                  | 55                 | ECOR60        | Urine              | Human Female      | ECOR              |                | 1                   | 1                   |
| 7                  | 6                  | ECOR61        | Feces              | Human Female      | ECOR              |                | 3                   | 3                   |
| 7                  | 6                  | ECOR62        | Urine              | Human Female      | ECOR              |                | 3                   | 3                   |
| 19                 | 22                 | ECOR63        | Feces              | Human Female      | ECOR              |                | 1                   | 1                   |
| 7                  | 6                  | ECOR64        | Urine              | Human Female      | ECOR              |                | 3                   | 3                   |
| 75                 | 55                 | ECOR65        | Feces              | Celebese ape      | ECOR              |                | 1                   | 1                   |
| 48                 | 46                 | ECOR66        | Feces              | Celebese ape      | ECOR              |                | 1                   | 1                   |
| 20                 | 24                 | ECOR67        | Feces              | Goat              | ECOR              |                | 3                   | 3                   |
| 6                  | 44                 | ECOR68        | Feces              | Giraffe           | ECOR              |                | 3                   | 3                   |
| 58                 | 26                 | ECOR69        | Feces              | Celebese ape      | ECOR              |                | 3                   | 2                   |
| 7                  | 6                  | ECOR70        | Feces              | Gorilla           | ECOR              |                | 3                   | 3                   |
| 7                  | 6                  | ECOR71        | Urine              | Human Female      | ECOR              |                | 3                   | 3                   |
| 6                  | 44                 | ECOR72        | Urine              | Human Female      | ECOR              |                | 3                   | 3                   |
| 71                 | 56                 | TB1828A       | Urine              |                   |                   |                | 3                   | 3                   |
| 56                 | 41                 | TOP326        | Periurethra        | Human Female      | TOP               | 2              | 3                   | 2                   |
| 50                 | 8                  | TOP413        | Urine              | Human Female      | TOP               | 5              | 1                   | 1                   |
| 67                 | 15                 | TOP690        | Urine              | Human Female      | TOP               | 9              | 3                   | 3                   |
| 62                 | 21                 | TOP699        | Urine              | Human Female      | TOP               | 11             | 3                   | 2                   |
| 65                 | 9                  | TOP855        | Urine              | Human Female      | TOP               | 12             | 3                   | 2                   |
| 11                 | 42                 | TOP845        | Periurethra        | Human Female      | TOP               | 12             | 1                   | 1                   |
| 65                 | 9                  | TOP870        | Periurethra        | Human Female      | TOP               | 12             | 3                   | 2                   |
| 7                  | 6                  | TOP294        | Urine              | Human Female      | TOP               | 13             | 3                   | 3                   |

## Clinical strains

| <i>fimH</i> allele | <i>fimC</i> allele | Original Name | Isolation Location | Isolation Species | Study/Collection | Patient Number | <i>fimH</i> subtree | <i>fimC</i> subtree |
|--------------------|--------------------|---------------|--------------------|-------------------|------------------|----------------|---------------------|---------------------|
| 7                  | 6                  | TOP295        | Periurethra        | Human Female      | TOP              | 13             | 3                   | 3                   |
| 7                  | 6                  | TOP542        | Urine              | Human Female      | TOP              | 13             | 3                   | 3                   |
| 7                  | 6                  | TOP537        | Periurethra        | Human Female      | TOP              | 13             | 3                   | 3                   |
| 7                  | 6                  | TOP920        | Urine              | Human Female      | TOP              | 14             | 3                   | 3                   |
| 7                  | 6                  | TOP924        | Urine              | Human Female      | TOP              | 14             | 3                   | 3                   |
| 7                  | 6                  | TOP925?       | Periurethra        | Human Female      | TOP              | 14             | 3                   | 3                   |
| 27                 | 17                 | TOP764        | Urine              | Human Female      | TOP              | 17             | 1                   | 1                   |
| 27                 | 17                 | TOP758        | Periurethra        | Human Female      | TOP              | 17             | 1                   | 1                   |
| 73                 | 55                 | TOP551        | Periurethra        | Human Female      | TOP              | 20             | 1                   | 1                   |
| 73                 | 55                 | TOP775        | Urine              | Human Female      | TOP              | 21             | 1                   | 1                   |
| 73                 | 55                 | TOP769        | Periurethra        | Human Female      | TOP              | 21             | 1                   | 1                   |
| 45                 | 13                 | TOP1126       | Urine              | Human Female      | TOP              | 26             | 1                   | 1                   |
| 45                 | 13                 | TOP1104       | Periurethra        | Human Female      | TOP              | 26             | 1                   | 1                   |
| 9                  | 15                 | TOP1069       | Urine              | Human Female      | TOP              | 31             | 3                   | 3                   |
| 9                  | 15                 | TOP1070       | Periurethra        | Human Female      | TOP              | 31             | 3                   | 3                   |
| 69                 | 8                  | TOP1187       | Urine              | Human Female      | TOP              | 34             | 1                   | 1                   |
| 69                 | 8                  | TOP1274       | Urine              | Human Female      | TOP              | 34             | 1                   | 1                   |
| 69                 | 8                  | TOP1250       | Periurethra        | Human Female      | TOP              | 34             | 1                   | 1                   |
| 73                 | 55                 | TOP1193       | Urine              | Human Female      | TOP              | 35             | 1                   | 1                   |
| 73                 | 55                 | TOP1207       | Urine              | Human Female      | TOP              | 35             | 1                   | 1                   |
| 73                 | 55                 | TOP1233       | Urine              | Human Female      | TOP              | 35             | 1                   | 1                   |
| 73                 | 55                 | TOP1218       | Periurethra        | Human Female      | TOP              | 35             | 1                   | 1                   |
| 8                  | 58                 | TOP1416       | Urine              | Human Female      | TOP              | 41             | 1                   | 1                   |
| 8                  | 58                 | TOP1490       | Urine              | Human Female      | TOP              | 41             | 1                   | 1                   |
| 8                  | 58                 | TOP1509       | Urine              | Human Female      | TOP              | 41             | 1                   | 1                   |
| 8                  | 58                 | TOP1501       | Periurethra        | Human Female      | TOP              | 41             | 1                   | 1                   |
| 74                 | 34                 | TOP1543       | Urine              | Human Female      | TOP              | 41             | 3                   | 3                   |
| 74                 | 34                 | TOP1561       | Urine              | Human Female      | TOP              | 41             | 3                   | 3                   |
| 74                 | 34                 | TOP1552       | Periurethra        | Human Female      | TOP              | 41             | 3                   | 3                   |
| 65                 | 9                  | TOP101        | Urine              | Human Female      | TOP              | 1              | 3                   | 2                   |
| 27                 | 17                 | TOP118        | Urine              | Human Female      | TOP              | 3              | 1                   | 1                   |
| 22                 | 25                 | TOP195        | Urine              | Human Female      | TOP              | 6              | 3                   | 2                   |
| 65                 | 9                  | TOP204        | Urine              | Human Female      | TOP              | 8              | 3                   | 2                   |
| 34                 | 16                 | TOP210        | Urine              | Human Female      | TOP              | 10             | 2                   | 2                   |
| 73                 | 55                 | TOP309        | Urine              | Human Female      | TOP              | 15             | 1                   | 1                   |
| 52                 | 38                 | TOP373        | Urine              | Human Female      | TOP              | 22             | 1                   | 1                   |
| 36                 | 31                 | TOP387        | Urine              | Human Female      | TOP              | 23             | 1                   | 1                   |
| 7                  | 6                  | TOP591        | Urine              | Human Female      | TOP              | 25             | 3                   | 3                   |
| 67                 | 15                 | TOP599        | Urine              | Human Female      | TOP              | 9              | 3                   | 3                   |
| 57                 | 31                 | TOP739        | Urine              | Human Female      | TOP              | 27             | 1                   | 1                   |
| 65                 | 9                  | TOP837        | Urine              | Human Female      | TOP              | 28             | 3                   | 2                   |
| 26                 | 31                 | TOP998        | Urine              | Human Female      | TOP              | 30             | 1                   | 1                   |
| 65                 | 9                  | TOP1006       | Urine              | Human Female      | TOP              | 29             | 3                   | 2                   |
| 33                 | 31                 | TOP1186       | Urine              | Human Female      | TOP              | 36             | 1                   | 1                   |
| 56                 | 39                 | TOP1290       | Urine              | Human Female      | TOP              | 38             | 3                   | 2                   |
| 72                 | 49                 | TOP1371       | Urine              | Human Female      | TOP              | 39             | 2                   | 3                   |
| 47                 | 10                 | TOP1378       | Urine              | Human Female      | TOP              | 40             | 3                   | 3                   |
| 37                 | 34                 | TOP1425       | Urine              | Human Female      | TOP              | 42             | 3                   | 3                   |
| 65                 | 9                  | TOP1564       | Urine              | Human Female      | TOP              | 46             | 3                   | 2                   |
| 74                 | 34                 | TOP1565       | Urine              | Human Female      | TOP              | 45             | 3                   | 3                   |
| 74                 | 34                 | TOP1580       | Urine              | Human Female      | TOP              | 47             | 3                   | 3                   |
| 60                 | 26                 | TOP1605       | Urine              | Human Female      | TOP              | 48             | 3                   | 2                   |
| 27                 | 17                 | TOP1609       | Urine              | Human Female      | TOP              | 49             | 1                   | 1                   |
| 27                 | 17                 | TOP1621       | Urine              | Human Female      | TOP              | 49             | 1                   | 1                   |
| 60                 | 26                 | TOP1648       | Urine              | Human Female      | TOP              | 48             | 3                   | 2                   |
| 70                 | 17                 | TOP1649       | Urine              | Human Female      | TOP              | 50             | 1                   | 1                   |
| 63                 | 44                 | TOP1650       | Urine              | Human Female      | TOP              | 51             | 3                   | 3                   |
| 49                 | 55                 | TOP1729       | Urine              | Human Female      | TOP              | 53             | 1                   | 1                   |
| 74                 | 34                 | TOP1829       | Urine              | Human Female      | TOP              | 54             | 3                   | 3                   |
| 74                 | 34                 | TOP1858       | Urine              | Human Female      | TOP              | 54             | 3                   | 3                   |
| 10                 | 30                 | TOP1950       | Urine              | Human Female      | TOP              | 56             | 3                   | 3                   |
| 79                 | 55                 | TOP1961       | Urine              | Human Female      | TOP              | 57             | 1                   | 1                   |

## Clinical strains

| <i>fimH</i> allele | <i>fimC</i> allele | Original Name | Isolation Location | Isolation Species | Study/Collection | Patient Number | <i>fimH</i> subtree | <i>fimC</i> subtree |
|--------------------|--------------------|---------------|--------------------|-------------------|------------------|----------------|---------------------|---------------------|
| 74                 | 34                 | TOP1987       | Urine              | Human Female      | TOP              | 54             | 3                   | 3                   |
| 27                 | 17                 | TOP2116       | Urine              | Human Female      | TOP              | 56             | 1                   | 1                   |
| 73                 | 55                 | TOP2161       | Urine              | Human Female      | TOP              | 59             | 1                   | 1                   |
| 73                 | 55                 | TOP2199       | Urine              | Human Female      | TOP              | 59             | 1                   | 1                   |
| 48                 | 46                 | TOP2205       | Urine              | Human Female      | TOP              | 60             | 1                   | 1                   |
| 27                 | 17                 | TOP2216       | Urine              | Human Female      | TOP              | 56             | 1                   | 1                   |
| 6                  | 30                 | TOP2293       | Urine              | Human Female      | TOP              | 63             | 3                   | 3                   |
| 7                  | 6                  | TOP2303       | Urine              | Human Female      | TOP              | 65             | 3                   | 3                   |
| 7                  | 6                  | TOP2315       | Urine              | Human Female      | TOP              | 64             | 3                   | 3                   |
| 7                  | 6                  | TOP2316       | Urine              | Human Female      | TOP              | 64             | 3                   | 3                   |
| 69                 | 8                  | TOP2339       | Urine              | Human Female      | TOP              | 66             | 1                   | 1                   |
| 7                  | 27                 | TOP2362       | Urine              | Human Female      | TOP              | 67             | 3                   | 3                   |
| 63                 | 44                 | TOP2363       | Urine              | Human Female      | TOP              | 69             | 3                   | 3                   |
| 67                 | 43                 | TOP2364       | Urine              | Human Female      | TOP              | 70             | 3                   | 3                   |
| 52                 | 38                 | TOP2385       | Urine              | Human Female      | TOP              | 71             | 1                   | 1                   |
| 52                 | 38                 | TOP2417       | Urine              | Human Female      | TOP              | 71             | 1                   | 1                   |
| 60                 | 26                 | TOP2433       | Urine              | Human Female      | TOP              | 74             | 3                   | 2                   |
| 69                 | 8                  | TOP2434       | Urine              | Human Female      | TOP              | 73             | 1                   | 1                   |
| 73                 | 55                 | TOP2445       | Urine              | Human Female      | TOP              | 75             | 1                   | 1                   |
| 40                 | 55                 | TOP2634       | Urine              | Human Female      | TOP              | 78             | 1                   | 1                   |
| 38                 | 17                 | TOP2652       | Urine              | Human Female      | TOP              | 72             | 1                   | 1                   |
| 48                 | 46                 | TOP2653       | Urine              | Human Female      | TOP              | 79             | 1                   | 1                   |
| 65                 | 9                  | TOP2801       | Urine              | Human Female      | TOP              | 68             | 3                   | 2                   |
| 13                 | 35                 | pyelo19       | Urine              | Human Female      |                  |                | 3                   | 1                   |
| 21                 | 30                 | pyelo31       | Urine              | Human Female      |                  |                | 3                   | 3                   |
| 7                  | 6                  | pyelo33       | Urine              | Human Female      |                  |                | 3                   | 3                   |
| 57                 | 31                 | pyelo37       | Urine              | Human Female      |                  |                | 1                   | 1                   |
| 7                  | 6                  | pyelo41       | Urine              | Human Female      |                  |                | 3                   | 3                   |
| 19                 | 22                 | 1003 UTI      | Urine              | Human Female      |                  |                | 1                   | 1                   |
| 47                 | 44                 | 1003 Rectal   | Feces              | Human Female      |                  |                | 3                   | 3                   |
| 73                 | 55                 | 1182 UTI      | Urine              | Human Female      |                  |                | 1                   | 1                   |
| 51                 | 55                 | 1182 Rectal   | Feces              | Human Female      |                  |                | 1                   | 1                   |
| 23                 | 13                 | 1254 UTI      | Urine              | Human Female      |                  |                | 1                   | 1                   |
| 44                 | 32                 | 1254 Rectal   | Feces              | Human Female      |                  |                | 3                   | 2                   |
| 64                 | 6                  | 1266 UTI      | Urine              | Human Female      |                  |                | 3                   | 3                   |
| 63                 | 44                 | 1266 Rectal1  | Feces              | Human Female      |                  |                | 3                   | 3                   |
| 63                 | 44                 | 1266 Rectal2  | Feces              | Human Female      |                  |                | 3                   | 3                   |
| 7                  | 6                  | 1333 UTI      | Urine              | Human Female      |                  |                | 3                   | 3                   |
| 60                 | 26                 | 1333 Rectal   | Feces              | Human Female      |                  |                | 3                   | 2                   |
| 65                 | 35                 | 17 Rectal1    | Feces              | Human Female      |                  |                | 3                   | 1                   |
| 65                 | 35                 | 17 Rectal2    | Feces              | Human Female      |                  |                | 3                   | 1                   |

Strain names, isolation locations (where known), and other information are shown. *fimH* and *fimC* alleles are coded as numbers that correspond to labels on phylogenetic trees in Fig. S1. The subtree in which the *fimH* and *fimC* sequences fall for each strain is indicated in the right two columns.

1. ECOR Ochman H, Selander RK (1984) Standard reference strains of *Escherichia coli* from natural populations. *J Bacteriol* 157:690–693
2. TOP Rosen DA, Hooton TM, Stamm WE, Humphrey PA, Hultgren SJ (2007) Detection of intracellular bacterial communities in human urinary tract infection. *PLoS Med* 4:e329.

**Table S2. PAML results**

Whole tree and branch-site models

| Gene        | Subtree | M1       | M2       | <i>p</i> value | M7       | M8       | <i>p</i> value | BSA      | <i>p</i> value | w    | amino acids (prob)                                  | Bonferroni correction (# tests) |
|-------------|---------|----------|----------|----------------|----------|----------|----------------|----------|----------------|------|-----------------------------------------------------|---------------------------------|
| <i>fimH</i> |         | -2751.36 | -2747.87 | 0.1526         | -2751.71 | -2747.77 | 0.0973         |          |                |      |                                                     | 5                               |
|             | 1       |          |          |                |          |          |                | -2748.42 | 0.2650         |      |                                                     | 5                               |
|             | 1*      |          |          |                |          |          |                | -2746.7  | 0.0473         | 10.7 | 27A (0.944), 62S (0.948), 74T (0.940), 163V (0.978) | 5                               |
|             | 2       |          |          |                |          |          |                | -2750.39 | 1.0000         |      |                                                     | 5                               |
|             | 3       |          |          |                |          |          |                | -2751.42 | 1.0000         |      |                                                     | 5                               |
| <i>fimC</i> |         | -1773.09 | -1772.49 | 1.0000         | -1773.28 | -1772.39 | 1.0000         |          |                |      |                                                     | 4                               |
|             | 1       |          |          |                |          |          |                | -1773.09 | 1.0000         |      |                                                     | 4                               |
|             | 2       |          |          |                |          |          |                | -1773    | 1.0000         |      |                                                     | 4                               |
|             | 3       |          |          |                |          |          |                | -1771.63 | 0.9292         |      |                                                     | 4                               |

Site models using subtrees

| Gene        | Subtree | M1       | M2       | <i>p</i> value | M7       | M8       | <i>p</i> value | w    | proportion of codons under positive selection | amino acids (prob)                                               | Bonferroni correction (# tests) |
|-------------|---------|----------|----------|----------------|----------|----------|----------------|------|-----------------------------------------------|------------------------------------------------------------------|---------------------------------|
| <i>fimH</i> | 1       | -1624.3  | -1617.9  | 0.0067         | -1624.5  | -1617.9  | 0.0055         | 6.96 | 0.02983                                       | 27A (0.998), 62S (0.940), 66G (0.928), 74T (0.912), 163V (0.998) | 4                               |
|             | 1*      | -1555.48 | -1546.97 | 0.0008         | -1555.69 | -1546.97 | 0.0007         | 9.12 | 0.02788                                       | 27A (0.999), 62S (0.958), 66G (0.951), 74T (0.940), 163V (0.999) | 4                               |
|             | 2       | -1293.37 | -1293.37 | 1.0000         | -1293.37 | -1293.37 | 1.0000         |      |                                               |                                                                  | 4                               |
|             | 3       | -2155.24 | -2154.51 | 1.0000         | -2155.45 | -2154.52 | 1.0000         |      |                                               |                                                                  | 4                               |
| <i>fimC</i> | 1       | -1140.95 | -1138.15 | 0.1823         | -1141.09 | -1138.15 | 0.1582         |      |                                               |                                                                  | 3                               |
|             | 2       | -1146.11 | -1145.62 | 1.0000         | -1145.62 | -1149.76 | 1.0000         |      |                                               |                                                                  | 3                               |
|             | 3       | -1395.6  | -1391.69 | 0.0600         | -1395.69 | -1391.95 | 0.0712         |      |                                               |                                                                  | 3                               |

Top half shows data for site and branch-site models using the entire *fimH* or *fimC* tree. Bottom half shows data for site models applied to individual subtrees. *FimH* subtree 1\* is subtree 1 but excluding the three sequences that do not encode for Ser70.

**Table S3. Correlation of FimH amino acid variation with habitat from which the strain was isolated**

| Amino acid | Urine            | Fecal           | <i>p</i> value |
|------------|------------------|-----------------|----------------|
| 70N, 78N   | 6                | 1               |                |
| 70N, 78S   | 110 <sup>†</sup> | 53 <sup>†</sup> | 0.0001**       |
| 70S, 78N   | 72 <sup>†</sup>  | 8 <sup>†</sup>  |                |
| 27A        | 149 <sup>†</sup> | 52 <sup>†</sup> | 0.3541         |
| 27T        | 0                | 1               |                |
| 27V        | 39 <sup>†</sup>  | 9 <sup>†</sup>  |                |
| 62A        | 13 <sup>†</sup>  | 0 <sup>†</sup>  | 0.0423*        |
| 62S        | 175 <sup>†</sup> | 62 <sup>†</sup> |                |
| 66C        | 4                | 1               |                |
| 66G        | 174 <sup>†</sup> | 57 <sup>†</sup> | 0.7533         |
| 66S        | 10 <sup>†</sup>  | 4 <sup>†</sup>  |                |
| 163A       | 15 <sup>†</sup>  | 1 <sup>†</sup>  | 0.1287         |
| 163I       | 0                | 1               |                |
| 163V       | 173 <sup>†</sup> | 60 <sup>†</sup> |                |

The number of strains with *fimH* sequences predicted to code for each of the amino acid variants is shown. Cells marked by <sup>†</sup> were used in Fisher's exact test for correlation between amino acid variation and site of isolation, and the 2-tailed *p*-value is shown. \* *P* < 0.05, \*\* *P* < 0.001.

**Table S4. List of DNA primers, plasmids, and strains**

| DNA Primers                  |                                                                          |                                                                                              |                                 |
|------------------------------|--------------------------------------------------------------------------|----------------------------------------------------------------------------------------------|---------------------------------|
| Name                         | Sequence                                                                 | Notes                                                                                        |                                 |
| uti8+4908948                 | CTACCGGGCGTCGGGTTACT                                                     | Used to sequence fimC                                                                        |                                 |
| uti8-4910078                 | CGATACGTCCTGGCGGTAA                                                      | Used to sequence fimC                                                                        |                                 |
| uti8-4910744                 | ATCACCGGGGCAAATCCTCT                                                     | Used to sequence fimC                                                                        |                                 |
| uti8+4913338                 | ACCGCGCAAAACATCCAGTT                                                     | Used to clone fimH, sequence fimH, and for diagnostic PCR                                    |                                 |
| uti8+4913927                 | CCGGTGGCGCTTTATTTGAC                                                     | Used to sequence fimH                                                                        |                                 |
| uti8-4914820                 | GGTATTCGGCATTGGCCTGA                                                     | Used to clone fimH                                                                           |                                 |
| uti8-4915222                 | GATCGTTTTGGGCCGTACCAG                                                    | Used to sequence fimH and for diagnostic PCR                                                 |                                 |
| Mlul-KanL                    | GATCACGCGTGGTTGGGAAGCCCTGCAAAG                                           | Used to amplify and clone the kanamycin gene from pKD4, tailed with a Mlul restriction site  |                                 |
| Ascl-KanR                    | GATCGGCGCGCCCGTCAATTCGAACCCAGA                                           | Used to amplify and clone the kanamycin gene from pKD4, tailed with an Ascl restriction site |                                 |
| uti8+4913515_fimH-pKD4-left  | ATCACCTATACCTACAGCTGAACCCAAA-GAGATGATTGTAATGAAACGAGGTGTAG-GCTGGAGCTGCTTC | Used to knock out fimH                                                                       |                                 |
| uti8-4914747_fimH-pKD4-right | CCTCTTAGATTACTTTGACCTGTCAGTA-AAAGACACGTTGAAAACCTGGGCATAT-GAATATCCTCCTTAG | Used to knock out fimH                                                                       |                                 |
| uti8-phaseL                  | GAGAAGAAGCTTGATTTAACTAATTG                                               | Used for type 1 phase assay                                                                  |                                 |
| uti8-phaseR                  | AGAGCCGCTGTAGAACTCAGG                                                    | Used for type 1 phase assay                                                                  |                                 |
| A27V-sew-L                   | TATGTAAACCTGCGCCTGTGGTGAAT-GTGGGGCAAAAC                                  | Used to make A27V mutation                                                                   |                                 |
| A27V-sew-R                   | GTTTTGCCCCACATTACCACAGCGCAAGTTTACATA                                     | Used to make A27V mutation                                                                   |                                 |
| A62S-sew-L                   | GTACACTGCAACGAGGTAGCGCTATG-GCGGCGTGTTA                                   | Used to make A62S mutation                                                                   |                                 |
| A62S-sew-R                   | TAACACGCCCCATAAGCGCTACCTCGTTGACAGTGTGAC                                  | Used to make A62S mutation                                                                   |                                 |
| G66C-sew-L                   | CGAGGTGCGGCTTATGGCTGCGTGTATCTAGTTTTTCC                                   | Used to make G66C mutation                                                                   |                                 |
| G66C-sew-R                   | GGAAAACTAGATAACACGCAGCCATA-AGCCGCACCTCG                                  | Used to make G66C mutation                                                                   |                                 |
| G66R-sew-L                   | CGAGGTGCGGCTTATGGCCGTGTGTTATCTAGTTTTTCC                                  | Used to make G66R mutation                                                                   |                                 |
| G66R-sew-R                   | GGAAAACTAGATAACACACGCCATA-AGCCGCACCTCG                                   | Used to make G66R mutation                                                                   |                                 |
| G66S-sew-L                   | CGAGGTGCGGCTTATGGCAGCGTGTATCTAGTTTTTCC                                   | Used to make G66S mutation                                                                   |                                 |
| G66S-sew-R                   | GGAAAACTAGATAACACGCCTGCCATA-AGCCGCACCTCG                                 | Used to make G66S mutation                                                                   |                                 |
| S70N/N78S-sew-L              | GCTTATGGCGGCGTGTATCTAACTTT-TCCGGGACCGTAAAATATAGCGGCAG-TAGCTATCCTTCCCT    | Used to make S70N/N78S mutation                                                              |                                 |
| S70N/N78S-sew-R              | AGGGAAAGGATAGCTACTGCCGC-TATATTTTACGGTCCCGGAAAAGTTA-GATAACACGCCCCATAAAGC  | Used to make S70N/N78S mutation                                                              |                                 |
| Q133K-sew-L                  | GCCGTGCTTATTTTGGCAAAAACCAACAACTATAACAGC                                  | Used to make Q133K mutation                                                                  |                                 |
| Q133K-sew-R                  | GCTGTTATAGTTGTGTTTTTCGCAAAATAAGCACGGC                                    | Used to make Q133K mutation                                                                  |                                 |
| V163A-sew-L                  | CCCCTGGCGGCTGCGATGCGTCTGCTCGTGTGATGTCACC                                 | Used to make V163A mutation                                                                  |                                 |
| V163A-sew-R                  | GGTGACATCACGAGCAGACGCATCG-CAGCCGCCAGTGGG                                 | Used to make V163A mutation                                                                  |                                 |
| FimBE KO #1                  | GGCAGGAATAATCGCTAGGGACCTAAG-CATTAGCATGATAATAGCGTGTAGGCTGGAGCTGCTTC       | Used to knock out fimB and fimE, from Hannan et al. (14)                                     |                                 |
| FimBE KO #2                  | GTCTTGATTTATTTGTTTTTAACTT-TATTATCAATTAGTAAAATGGGAATTAGCCATGGTCC          | Used to knock out fimB and fimE, from Hannan et al. (14)                                     |                                 |
| Plasmids                     |                                                                          |                                                                                              |                                 |
| Name                         | Parent plasmid                                                           | Notes                                                                                        | Source                          |
| pKM208                       |                                                                          | Source of Red recombinase                                                                    | Murphy and Campellone (3)       |
| pKD4                         |                                                                          | Source of kanamycin resistance cassette                                                      | Datsenko and Wanner (2)         |
| pCP20                        |                                                                          | Source of FLP recombinase                                                                    | Cherepanov and Wackernagel (13) |
| pUC19                        |                                                                          | General cloning vector                                                                       | NEB                             |
| pCR4-TOPO                    |                                                                          | General cloning vector                                                                       | Invitrogen                      |
| pSLC2-12-fimH-TOPO-1         | pCR4-TOPO                                                                | Contains fimH sequence from UTI89                                                            | This study                      |
| pSLC2-16-2                   | pSLC2-12-fimH-TOPO                                                       | Contains fimH sequence and kanamycin resistance cassette                                     | This study                      |



## Plasmids

| Name       | Parent plasmid    | Notes                                                                             | Source     |
|------------|-------------------|-----------------------------------------------------------------------------------|------------|
| pSLC2-24-3 | pUC19, pSLC2-16-2 | Contains <i>fimH</i> sequence and kanamycin resistance cassette, moved into pUC19 | This study |

## Strains

| Name                 | Parent strain        | Notes                                                            | Source     |
|----------------------|----------------------|------------------------------------------------------------------|------------|
| TOP10                |                      | General cloning strain                                           | Invitrogen |
| SLC2-12-1            | UTI89                | Kan resistant, <i>fimH</i> knockout                              | This study |
| SLC2-14-1            | SLC2-12-1            | Kan sensitive, <i>fimH</i> knockout                              | This study |
| SLC2-17- <i>fimH</i> | SLC2-14-1            | Contains pKM208 plasmid for expression of Red recombinase system | This study |
| SLC2-33-1            | SLC2-17- <i>fimH</i> | Wild type control                                                | This study |
| SLC2-35-1            | SLC2-17- <i>fimH</i> | Q133K                                                            | This study |
| SLC2-37-10           | SLC2-17- <i>fimH</i> | S70N, N78S                                                       | This study |
| SLC2-39-1            | SLC2-17- <i>fimH</i> | A27V                                                             | This study |
| SLC2-45-4            | SLC2-17- <i>fimH</i> | V163A                                                            | This study |
| SLC2-46-1            | SLC2-17- <i>fimH</i> | A62S                                                             | This study |
| SLC2-46-6            | SLC2-17- <i>fimH</i> | A62S, S70N, N78S                                                 | This study |
| SLC2-51-1-1          | SLC2-17- <i>fimH</i> | A27V, V163A                                                      | This study |
| SLC2-68-4-1          | SLC2-17- <i>fimH</i> | A27V, A62S, S70N, N78S                                           | This study |
| SLC2-68-6-1          | SLC2-17- <i>fimH</i> | A27V, A62S                                                       | This study |
| SLC2-68-48-1         | SLC2-17- <i>fimH</i> | A27V, S70N, N78S                                                 | This study |
| SLC2-68-184-1        | SLC2-17- <i>fimH</i> | S70N, N78S, V163A                                                | This study |
| SLC2-73-4-1          | SLC2-17- <i>fimH</i> | A27V, A62S, S70N, N78S, V163A                                    | This study |
| SLC2-73-48-1         | SLC2-17- <i>fimH</i> | A27V, S70N, N78S, V163A                                          | This study |
| SLC2-75-5-1          | SLC2-17- <i>fimH</i> | A62S, S70N, N78S, V163A                                          | This study |
| SLC2-76-2-1          | SLC2-17- <i>fimH</i> | A62S, V163A                                                      | This study |
| SLC2-89-3            | SLC2-17- <i>fimH</i> | A27V, A62S, V163A                                                | This study |
| SLC4-16-1-C1         | SLC2-17- <i>fimH</i> | G66C                                                             | This study |
| SLC4-16-1-R9         | SLC2-17- <i>fimH</i> | G66R                                                             | This study |
| SLC4-16-1-S8         | SLC2-17- <i>fimH</i> | G66S                                                             | This study |

Primer name, sequence, and comments are shown. Plasmids and strains used in the construction of *fimH* mutants are listed. Parent strain or plasmid, notes on usage, and source are shown.
